# Supplementary material for: Biomimetic mineralization of calcium carbonate mediated by a polypeptide-based copolymer
Source: Royal Society of Chemistry journal article supplement (doi:10.1039/c2tb00182a), 2012-11-30
Supplement: c2tb00182a.pdf [file c2tb00182a.pdf]

## Supporting Information

# **Biomimetic Mineralization of Calcium Carbonate Mediated by a Polypeptide-based Copolymer**

*Wenjie Zhu, Jiaping Lin\*, Chunhua Cai and Yingqing Lu*

*Shanghai Key Laboratory of Advanced Polymeric Materials, State Key Laboratory of Bioreactor Engineering, Key Laboratory for Ultrafine Materials of Ministry of Education, School of Materials Science and Engineering, East China University of Science and Technology, Shanghai 200237, China*

---

\* Corresponding author. Tel: +86-21-64253370; Fax: +86-21-64251644.

E-mail address: [jlin@ecust.edu.cn](mailto:jlin@ecust.edu.cn)

## 1. Characterization of $\beta$ -CD-*b*-PBLG and $\beta$ -CD-*b*-PLGA copolymers by $^1\text{H}$ -NMR

$^1\text{H}$  NMR spectra were recorded using Avance 550, Bruker. Figure S1 shows the  $^1\text{H}$  NMR spectra of  $\beta$ -CD-*b*-PBLG and  $\beta$ -CD-*b*-PLGA block copolymers in DMSO- $\text{d}_6$  solvent. The PBLG segment has NMR peaks at ( $\delta = 7.32, 5.04$ ). The  $\beta$ -CD segment has peaks at ( $\delta = 4.48, 3.72$ - $4.17, 1.75$ - $2.74$ ). Compared with the  $^1\text{H}$  NMR spectrum of  $\beta$ -CD-*b*-PBLG, the disappearance of the methylene proton peak (5.04 ppm) indicates the complete deprotection of the benzyl groups after the hydrolysis reaction.

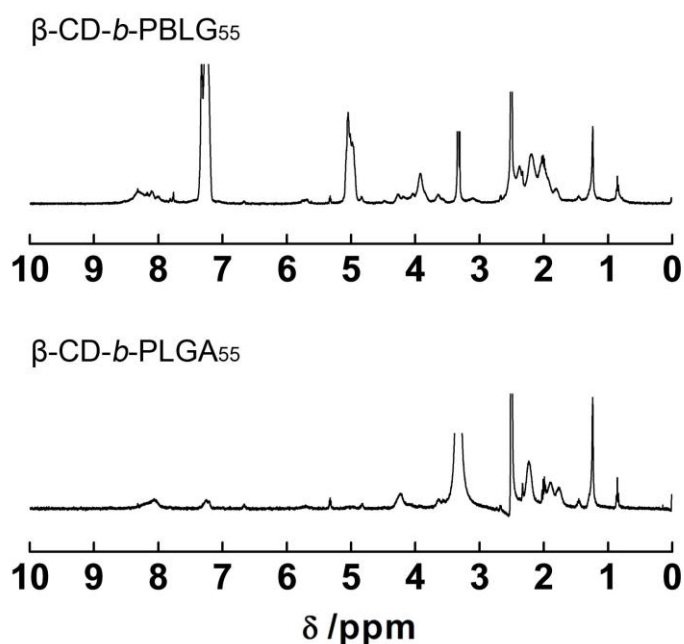

**Figure S1**  $^1\text{H}$  NMR spectra of  $\beta$ -CD-*b*-PBLG and  $\beta$ -CD-*b*-PLGA in DMSO- $\text{d}_6$  solvent.

## 2. Characterization of $\beta$ -CD-*b*-PBLG copolymers by GPC

The  $\beta$ -CD-*b*-PBLG copolymers with various PBLG block lengths were measured by GPC (Polymer Lab, PL-GPC50 plus) using PBLG with narrow molecular weight distribution as standard, performed in LiBr/DMF solution. All the samples show a monomodal GPC curve and narrow molecular weight distribution.

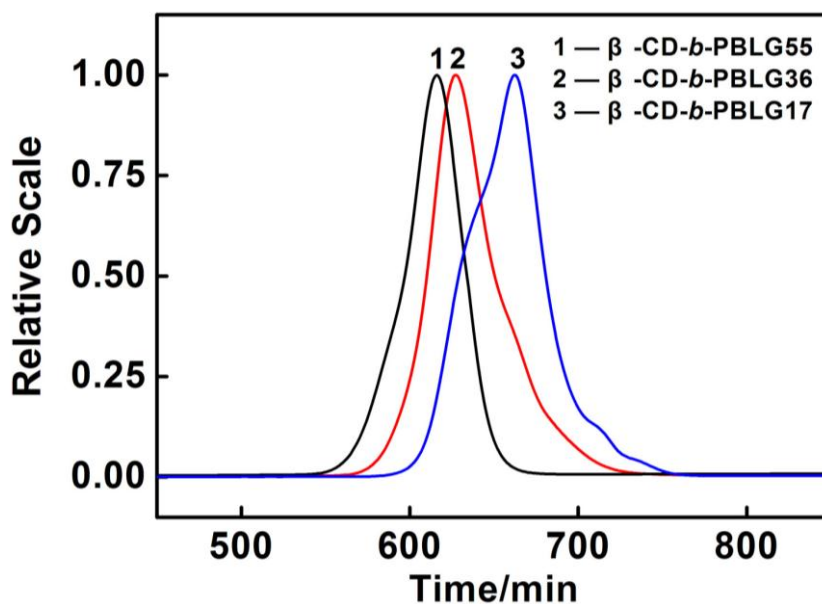

**Figure S2** GPC traces of  $\beta$ -CD-*b*-PBLG copolymers.

### 3. Lattice fringe image of the pseudo-dodecahedral crystal

Interstice and mesopore are widely observed in the lattice fringe image of the pseudo-dodecahedral crystal (as white arrow shows). The defects originate from the interstitial voids of the packed primary nanoparticles, showing the feature of mesocrystal.

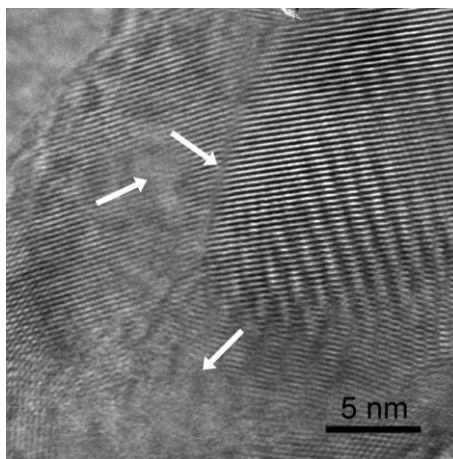

**Figure S3** HR-TEM image of an ultra thin section of the pseudo-dodecahedral CaCO<sub>3</sub> crystal prepared in the presence of 2 mM calcium ions and 2.0 g/L CG1.

#### 4. Thermal analysis of the CaCO<sub>3</sub> sample

Thermal analysis was applied to measure the content of the polymers in the CaCO<sub>3</sub> sample. TG curve shows two-step weight loss. The weight loss starting from 300 °C is attributed to the decomposition of the CG1 copolymer. The weight loss of the second step is corresponding to the decomposition of CaCO<sub>3</sub>.

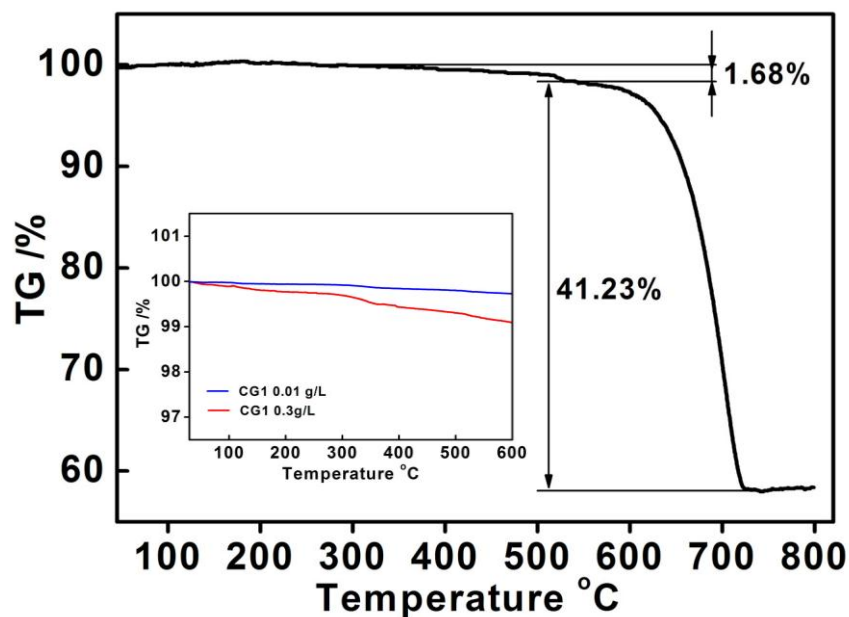

**Figure S4** TG curve of the pseudo-dodecahedral crystals obtained in 2.0 g L<sup>-1</sup> CG1 copolymer solution and the Ca<sup>2+</sup> concentration is 2 mM. And the inset shows the TG curves of samples obtained in 0.3 and 0.01 g L<sup>-1</sup> CG1 copolymer solutions. The sample formed in the presence of 0.3 g/L CG1 contains about 0.3 wt% of CG1. And in the case of 0.01 g/L CG1, there are very few polymers in the sample.

## 5. The influence of CG2 and CG3 on the mineralization behavior of CaCO<sub>3</sub>

CaCO<sub>3</sub> crystals were prepared in the presence of CG2 and CG3 with various polymer concentrations respectively, (a) CG2, 0.1 g L<sup>-1</sup>, (b) CG2, 2.0 g L<sup>-1</sup>, (c) CG3, 0.1 g L<sup>-1</sup>, (d) CG3, 2.0 g L<sup>-1</sup>. At a polymer concentration of 0.1 g L<sup>-1</sup>, rods were generated for both CG2 and CG3 (Figure S3a, b). While a high polymer concentration of 2.0 g L<sup>-1</sup> leads to the formation of pseudo-dodecahedrons (Figure S3c, d).

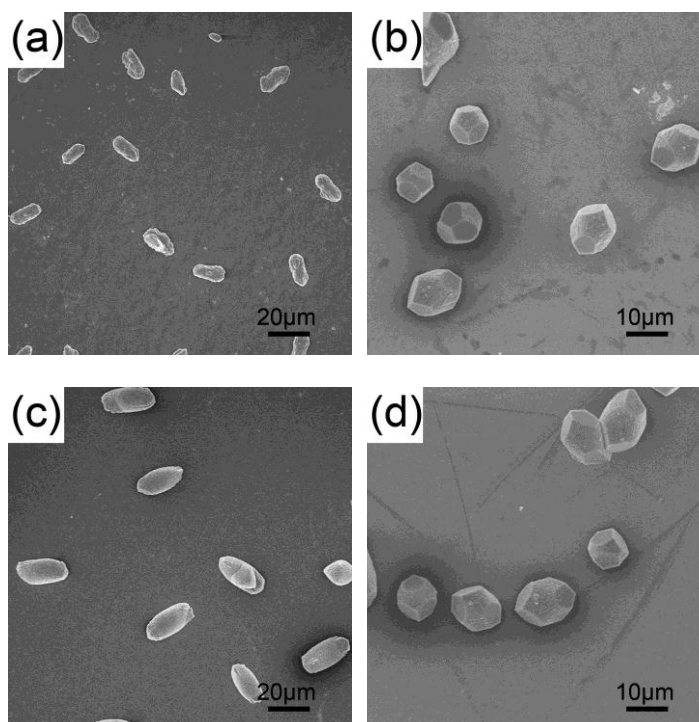

**Figure S5** SEM images of CaCO<sub>3</sub> crystals obtained in the presence of CG2 and CG3 at various conditions (a) CG2, 0.1 g L<sup>-1</sup>, (b) CG2, 2.0 g L<sup>-1</sup>, (c) CG3, 0.1 g L<sup>-1</sup>, (d) CG3, 2.0 g L<sup>-1</sup>. The Ca<sup>2+</sup> concentration is fixed at 2 mM.

## 6. CaCO<sub>3</sub> crystallization under control of β-CD and PLGA

In the presence of β-CD at a polymer concentration of 2.0 g L<sup>-1</sup>, rhombohedral calcite was obtained (a). The crystals are mostly rod calcite crystals in PLGA<sub>99</sub> solution at a concentration between 0.1 to 3.0 g L<sup>-1</sup>. Figure S4b shows the rod crystals formed in PLGA solution at a concentration of 2.0 g L<sup>-1</sup>. The results indicate that the β-CD is a solvating block and the PLGA is a binding block.

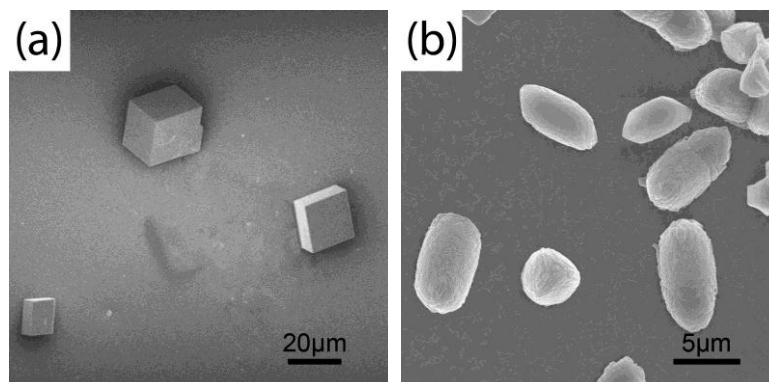

**Figure S6** SEM images of CaCO<sub>3</sub> crystals prepared in the presence of β-CD and PLGA.
